# Supplementary material for: Overexpression of Angiogenic Factors and Matrix Metalloproteinases in the Saliva of Oral Squamous Cell Carcinoma Patients: Potential Non-Invasive Diagnostic and Therapeutic Biomarkers
Source: Research Square preprint supplement (doi:10.21203/rs.3.rs-646337/v1), 2021-07-06
Supplement: Supplementary file 1 [file 08005ecaf353d58c6c9344af.docx]

**Table S1. Volunteer information**

| **No.** | **Sample collection** | **Age** | **Gender** | **TNM stage** | **Anatomical site**  **of the lesion** | **Tumor size (cm)** |
| --- | --- | --- | --- | --- | --- | --- |
| 1 | Tissue/  Saliva | 42 | Female | T4N0M0 | Right tongue,Mouth floor | 4.0*5.0 |
| 2 | Tissue/  Saliva | 63 | Female | T2N0M0 | Left middle of tongue | 3.0*1.5 |
| 3 | Tissue/  Saliva | 50 | Female | T2N0M0 | Left margin of tongue | 4.0*3.0 |
| 4 | Tissue/  Saliva | 49 | Female | T3N1M0 | Left margin of tongue | 2.7*2.6 |
| 5 | Tissue/  Saliva | 74 | Male | T3N2M0 | Left margin of tongue | 4.5*3.0 |
| 6 | Tissue/  Saliva | 45 | Male | T2N0M0 | Right margin of tongue | 2.5*1.5 |
| 7 | Tissue/  Saliva | 39 | Male | T1N0M0 | Right posterior margin of tongue | 2.0*1.8*1.8 |
| 8 | Tissue/  Saliva | 33 | Male | T3N1M0 | Right margin of tongue | 3.0*4.0 |
| 9 | Tissue | 74 | Female | T2N0M0 | Right margin of tongue | 3.0*2.0 |
| 10 | Tissue | 31 | Male | T2N0M0 | Right tongue,  Mouth floor | 1.3*2.4*2.7 |
| 11 | Saliva | 25 | Female | Healthy individual | / | / |
| 12 | Saliva | 24 | Female | Healthy individual | / | / |
| 13 | Saliva | 23 | Male | Healthy individual | / | / |
| 14 | Saliva | 20 | Male | Healthy individual | / | / |
| 15 | Saliva | 29 | Female | Healthy individual | / | / |
| 16 | Saliva | 29 | Female | Healthy individual | / | / |
| 17 | Saliva | 41 | Male | Healthy individual | / | / |
| 18 | Saliva | 37 | Male | Healthy individual | / | / |

TNM, Tumor Node Metastasis.
