# Supplementary material for: Overexpression of Angiogenic Factors and Matrix Metalloproteinases in the Saliva of Oral Squamous Cell Carcinoma Patients: Potential Non-Invasive Diagnostic and Therapeutic Biomarkers
Source: Research Square preprint supplement (doi:10.21203/rs.3.rs-646337/v1), 2021-07-06
Supplement: Supplementary file 2 [file a24ca2dd1ef62246e220da23.docx]

**Table S2. Survival analysis**

| **Gene Name** | **Group** | **5 Years Surviral (%)** | **p-Value** | |
| --- | --- | --- | --- | --- |
| **Log-rank (Mantel-Cox) test** | **Summary** |
| ANG | Low | 52.932 | 0.0094 | ** |
| High | 41.701 |
| bFGF | Low | 46.292 | 0.7148 | ns |
| High | 48.721 |
| EGF | Low | 50.681 | 0.0495 | * |
| High | 44.047 |
| HGF | Low | 42.139 | 0.0533 | ns |
| High | 52.912 |
| HB-EGF | Low | 55.895 | 0.0055 | ** |
| High | 38.735 |
| VEGF | Low | 47.788 | 0.3565 | ns |
| High | 47.21 |
| PDGF-BB | Low | 50.473 | 0.0285 | * |
| High | 44.666 |
| Leptin | Low | 47.165 | 0.8679 | ns |
| High | 47.91 |
| MMP-1 | Low | 53.066 | 0.1056 | ns |
| High | 41.385 |
| MMP-2 | Low | 42.8 | 0.5248 | ns |
| High | 52.08 |
| MMP-3 | Low | 48.385 | 0.2857 | ns |
| High | 47.322 |
| MMP-8 | Low | 47.943 | 0.3454 | ns |
| High | 45.776 |
| MMP-9 | Low | 50.784 | 0.1032 | ns |
| High | 44.213 |
| MMP-10 | Low | 51.17 | 0.36 | ns |
| High | 44.416 |
| MMP-13 | Low | 46.94 | 0.1101 | ns |
| High | 48.239 |
| TIMP-1 | Low | 52.581 | 0.0023 | ** |
| High | 42.312 |
| TIMP-2 | Low | 49.893 | 0.1719 | ns |
| High | 45.48 |
| TIMP-4 | Low | 56.999 | 0.0004 | ** |
| High | 38.988 |
| *,<p-value<0.05; **,p-value<0.01. | | | | |
